# Supplementary material for: Irreversible specialization for speech perception in early international adoptees
Source: PubMed Central journal article supplement (PMC9433419; doi:10.1093/cercor/bhab447), 2021-12-25
Supplement: irreversible_specialization_supplementary_bhab447.pdf [file irreversible_specialization_supplementary_bhab447.pdf]

# Irreversible specialization for speech perception in early international adoptees – Supplemental information

Table 1: Model coefficients for the MMN amplitude analysis. The model included the effect coded categorical variables group (adopted, Swedish, Chinese) and condition (tone, vowel), with current age, gender, and handedness as covariates. The variable age was centered around zero and scaled to a unit standard deviation of 1. Handedness was assessed using the Edinburgh Handedness inventory, and values above 0 were treated as right handed. Random effects included by-participant random intercept. Average MMN amplitude at channel Fz between 0.15–0.3 s for each trial was used as the dependent variable.

| Name                         | Estimate | SE    | t      | DF  | p      | Lower  | Upper  |
|------------------------------|----------|-------|--------|-----|--------|--------|--------|
| (Intercept)                  | -0.84    | 1.335 | -0.629 | 111 | 0.531  | -3.486 | 1.806  |
| Group Swedish                | 0.162    | 0.211 | 0.768  | 111 | 0.444  | -0.256 | 0.58   |
| Group Chinese                | -0.218   | 0.23  | -0.948 | 111 | 0.345  | -0.674 | 0.238  |
| Female                       | -0.041   | 0.052 | -0.787 | 111 | 0.433  | -0.144 | 0.062  |
| Condition Tone               | -0.289   | 0.058 | -4.987 | 111 | <0.001 | -0.403 | -0.174 |
| Handedness                   | -0.043   | 0.832 | -0.051 | 111 | 0.959  | -1.69  | 1.605  |
| Age                          | 0.01     | 0.164 | 0.060  | 111 | 0.952  | -0.314 | 0.334  |
| Group Swedish:Condition Tone | 0.194    | 0.081 | 2.408  | 111 | 0.018  | 0.034  | 0.354  |
| Group Chinese:Condition Tone | -0.168   | 0.081 | -2.075 | 111 | 0.040  | -0.328 | -0.008 |

Table 2: Model coefficients for the MMN latency analysis. The effect coded variables group and condition, and the covariates gender, age, and handedness, were used as fixed effects, with by-participant random intercept. The variable age was centered around zero and scaled to a unit standard deviation of 1. Handedness was assessed using the Edinburgh Handedness inventory, and values above 0 were treated as right handed. The outcome variable was the peak latency between 0.15–0.3 s in the deviant-minus-standard difference wave.

| Name                         | Estimate | SE    | t      | DF  | p      | Lower  | Upper  |
|------------------------------|----------|-------|--------|-----|--------|--------|--------|
| (Intercept)                  | 0.266    | 0.02  | 13.04  | 111 | <0.001 | 0.226  | 0.307  |
| Group Swedish                | -0.006   | 0.005 | -1.219 | 111 | 0.226  | -0.016 | 0.004  |
| Group Chinese                | 0.002    | 0.005 | 0.294  | 111 | 0.769  | -0.009 | 0.012  |
| Female                       | 0.007    | 0.008 | 0.811  | 111 | 0.419  | -0.009 | 0.023  |
| Condition Tone               | 0.006    | 0.002 | 2.609  | 111 | 0.010  | 0.001  | 0.011  |
| Handedness                   | -0.043   | 0.019 | -2.232 | 111 | 0.028  | -0.081 | -0.005 |
| Age                          | 0.002    | 0.004 | 0.556  | 111 | 0.579  | -0.005 | 0.009  |
| Group Swedish:Condition Tone | 0.001    | 0.003 | 0.350  | 111 | 0.727  | -0.005 | 0.008  |
| Group Chinese:Condition Tone | -0.007   | 0.003 | -2.028 | 111 | 0.045  | -0.013 | 0.001  |

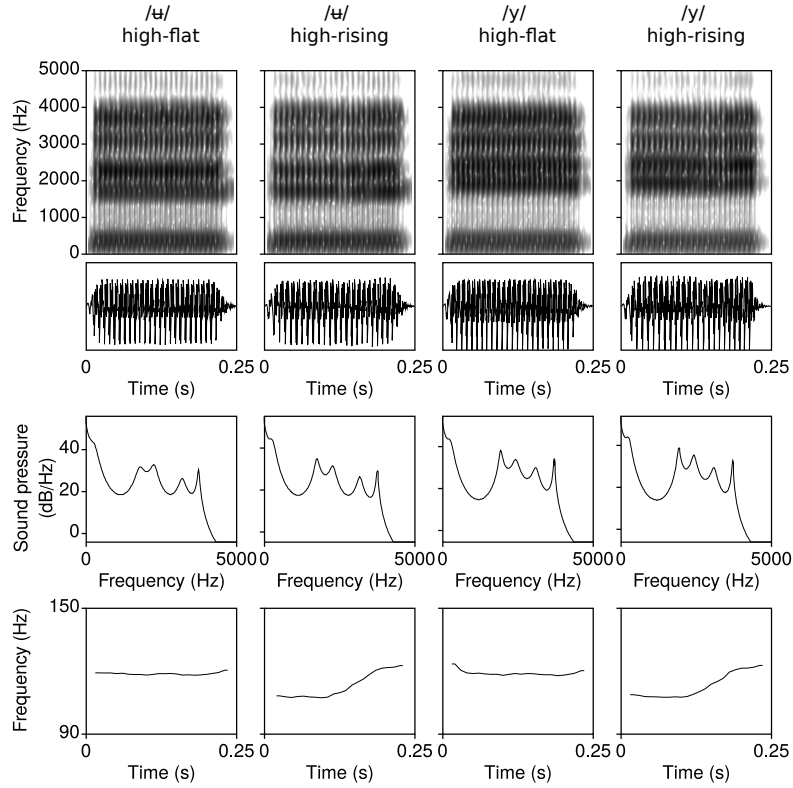

Figure 1: Auditory stimuli used in the experiment. Each panel displays the spectrogram, amplitude, spectrum (LPC smoothed, pre-emphasis 50 Hz), and pitch envelope, for combined Swedish vowels (/y/, /ɤ/) and Chinese lexical tones (high-flat, high-rising).
